# Supplementary material
Source: Springer Nature journal article supplement (https://www.springermedizin.de/resource/supplementary/13054_2012_607_MOESM2_ESM.pdf/9708850)

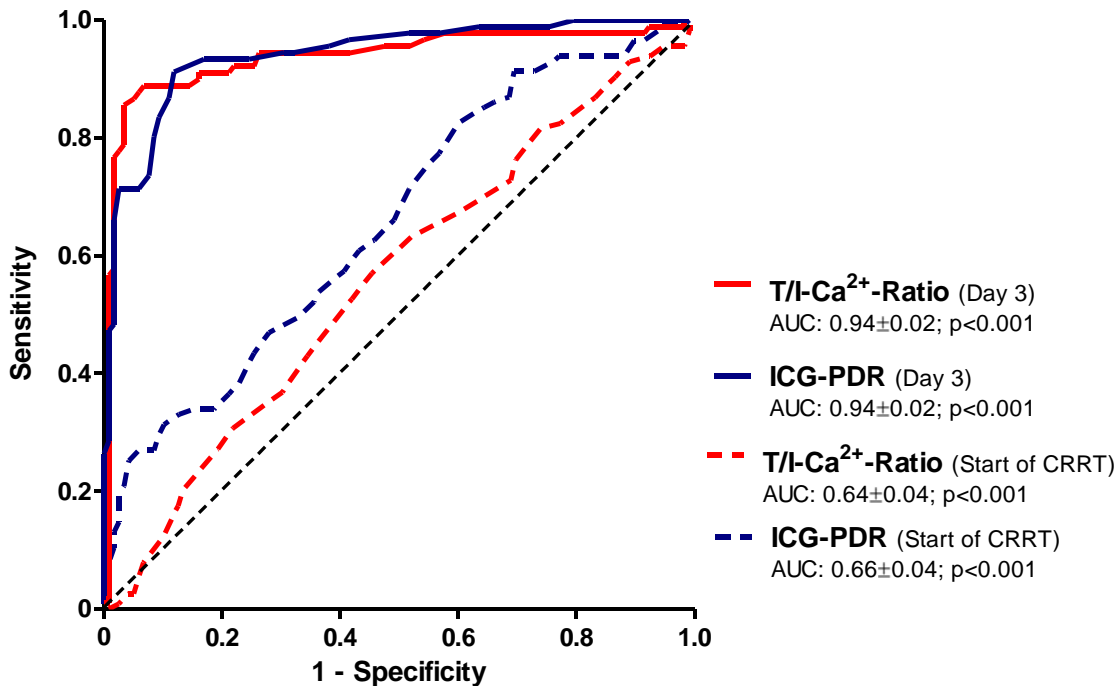

Supplement: MOESM2 [file 9708850]
